# Supplementary material for: Unionisation and injury risk in construction: a replication study
Source: HighWire-hosted journal article supplement (doi:10.1136/oemed-2021-107617), 2021-09-20
Supplement: oemed-2021-107617supp001_data_supplement.pdf [file oemed-2021-107617supp001_data_supplement.pdf]

**Appendix A: Distribution of industrial sub-sector in the sample of Ontario ICI construction businesses by unionization status**

|                                                        | Union<br>n = 5267 |      | Non-union<br>n = 55,158 |      | p-value |
|--------------------------------------------------------|-------------------|------|-------------------------|------|---------|
| <i>Industrial sub-sector (classification unit, CU)</i> |                   |      |                         |      | <0.0001 |
| Apartment and Condominium Construction                 | 32                | 0.6  | 282                     | 0.5  |         |
| Asbestos Abatement                                     | 44                | 0.8  | 85                      | 0.2  |         |
| Carpeting and Flooring                                 | 74                | 1.4  | 3,649                   | 6.6  |         |
| Caulking and Weatherstripping                          | 24                | 0.5  | 204                     | 0.4  |         |
| Concrete Cutting and Drilling                          | 25                | 0.5  | 148                     | 0.3  |         |
| Concrete Finishing                                     | 85                | 1.6  | 1,009                   | 1.8  |         |
| Concrete Sealing                                       | 40                | 0.8  | 375                     | 0.7  |         |
| Custom Welding Services                                | 37                | 0.7  | 595                     | 1.1  |         |
| Drain Contractors                                      | 23                | 0.4  | 229                     | 0.4  |         |
| Electrical Work                                        | 900               | 17.1 | 8,058                   | 14.6 |         |
| Equipment Rental (with Operator)                       | 149               | 2.8  | 307                     | 0.6  |         |
| Excavating and Grading                                 | 290               | 5.5  | 2,386                   | 4.3  |         |
| Form Work (High-Rise)                                  | 81                | 1.5  | 55                      | 0.1  |         |
| Glass and Glazing Work                                 | 127               | 2.4  | 453                     | 0.8  |         |
| Heavy Engineering Construction                         | 21                | 0.4  | 34                      | 0.1  |         |
| Industrial Maintenance and Repair Contracting          | 50                | 1.0  | 682                     | 1.2  |         |
| Industrial, Commercial and Institutional Construction  | 513               | 9.7  | 2,903                   | 5.3  |         |
| Insulation Work                                        | 60                | 1.1  | 474                     | 0.9  |         |
| Masonry Operations                                     | 141               | 2.7  | 2,462                   | 4.5  |         |
| Millwright and Rigging Work                            | 160               | 3.0  | 579                     | 1.1  |         |
| Non-Structural Interior Demolition                     | 35                | 0.7  | 167                     | 0.3  |         |
| Ornamental and Fabricated Metal Installation           | 101               | 1.9  | 464                     | 0.8  |         |
| Other Structural Work                                  | 1                 | 0.0  | 1                       | 0.0  |         |
| Other Trade Work                                       | 52                | 1.0  | 107                     | 0.2  |         |
| Painting and Decorating                                | 205               | 3.9  | 5,809                   | 10.5 |         |
| Painting of Structures                                 | 17                | 0.3  | 14                      | 0.0  |         |
| Piledriving Work                                       | 33                | 0.6  | 70                      | 0.1  |         |
| Plaster, Drywall and Acoustical Work                   | 475               | 9.0  | 4,081                   | 7.4  |         |
| Plumbing, Heating & Air Conditioning, Installation     | 783               | 14.9 | 8,831                   | 16.0 |         |
| Precast Concrete Installation                          | 8                 | 0.2  | 15                      | 0.0  |         |
| Roof Shingling                                         | 39                | 0.7  | 2,757                   | 5.0  |         |
| Sheet Metal and Built-Up Roofing                       | 80                | 1.5  | 559                     | 1.0  |         |

|                                    |     |     |       |     |  |
|------------------------------------|-----|-----|-------|-----|--|
| Sheet Metal and Other Duct Work    | 79  | 1.5 | 573   | 1.0 |  |
| Siding Work                        | 207 | 3.9 | 3,682 | 6.7 |  |
| Steel Reinforcing                  | 39  | 0.7 | 55    | 0.1 |  |
| Structural Steel Erection          | 76  | 1.4 | 81    | 0.2 |  |
| Terrazzo and Tile Work             | 54  | 1.0 | 2,785 | 5.1 |  |
| Thermal Insulation Work            | 81  | 1.5 | 82    | 0.2 |  |
| Wrecking and Structural Demolition | 26  | 0.5 | 56    | 0.1 |  |

p-value is based on Pearson's Chi-square test for differences.
